# Supplementary material for: A (bpy)2Ru-coordinated dehydro[12]annulene with exotopically fused diimine binding sitesElectronic supplementary information (ESI) available: Analytical data for the ruthenium complexes. See http://www.rsc.org/suppdata/cc/b3/b313788k/
Source: Royal Society of Chemistry journal article supplement (doi:10.1039/b313788k), 2004-01-01
Supplement: b313788k.pdf [file b313788k.pdf]

## Supplementary Information

to

### A (bpy)<sub>2</sub>Ru-coordinated dehydro[12]annulene with exotopically fused diimine binding sites

Sascha Ott<sup>a</sup> and Rüdiger Faust<sup>\*a,b</sup>

<sup>a</sup> Christopher-Ingold Laboratories, Department of Chemistry, University College London, 20 Gordon Street, London WC1H 0AJ (UK)

<sup>b</sup> Institute of Chemistry, Faculty of Physical Sciences, University of Kassel, Heinrich-Plett-Str. 40, 34132 Kassel (Germany). Fax: (+49)561 8044752; E-mail: r.faust@uni-kassel.de

#### Analytical data for ruthenium complexes 1, 11 and 12:

Complex 1:

<sup>1</sup>H-NMR (CD<sub>3</sub>CN, 500 MHz):  $\delta$  = 9.57 (d,  $J$  = 8.1 Hz, 4 H,  $\gamma$  CH), 8.55 (d,  $J$  = 8.2 Hz, 4 H,  $\delta$  bpy), 8.52 (d,  $J$  = 8.2 Hz, 4 H,  $\delta$  bpy), 8.37 (s, 4 H, phenazine CH), 8.19 (d,  $J$  = 5.5 Hz, 4 H,  $\alpha$  CH), 8.11 (m, 4 H,  $\gamma$  bpy), 8.03 (m, 4 H,  $\gamma$  bpy), 7.89 (dd,  $J$  = 8.1, 5.5 Hz, 4 H,  $\beta$  CH), 7.84 (m, 4 H,  $\alpha$  bpy), 7.72 (m, 4 H,  $\alpha$  bpy), 7.46 (m, 4 H,  $\beta$  bpy), 7.27 (m, 4 H,  $\beta$  bpy)

MALDI-TOF,  $m/z$  (%): 1919 (100) [ $M^+$  - 1 PF<sub>6</sub>], 1773 (30) [ $M^+$  - 2 PF<sub>6</sub>]

Elemental analysis: calcd. (Ru<sub>2</sub>C<sub>84</sub>H<sub>48</sub>N<sub>16</sub>(PF<sub>6</sub>)<sub>4</sub>• 8 H<sub>2</sub>O): C 45.6, H 2.8, N 10.1; found C 45.3, H 2.9, N 8.7

Complex 11:

<sup>1</sup>H-NMR (DMSO-d<sub>6</sub>, 500 MHz):  $\delta$  = 9.60 (d,  $J$  = 8.2 Hz, 2 H,  $\gamma$  CH), 8.86 (d,  $J$  = 8.2 Hz, 2 H,  $\delta$  bpy), 8.83 (d,  $J$  = 8.2 Hz, 2 H,  $\delta$  bpy), 8.59 (s, 2 H, phenazine CH), 8.22 (m, 4 H,  $\alpha$  CH,  $\gamma$  bpy), 8.13 (m, 2 H,  $\gamma$  bpy), 8.02 (dd,  $J$  = 8.2, 5.5 Hz, 2 H,  $\beta$  CH), 7.81 (m, 2 H,  $\alpha$  bpy), 7.76 (m, 2 H,  $\alpha$  bpy), 7.59 (m, 2 H,  $\beta$  bpy), 7.38 (m, 2 H,  $\beta$  bpy), 1.18 (m, 42 H, *i*-Pr)

FAB-MS,  $m/z$  (%): 1201 (4) [ $M^+$  - 1 PF<sub>6</sub>], 1056 (6) [ $M^+$  - 2 PF<sub>6</sub>]

Elemental analysis: calcd. (RuC<sub>60</sub>H<sub>66</sub>N<sub>8</sub>Si<sub>2</sub>(PF<sub>6</sub>)<sub>2</sub>•H<sub>2</sub>O): C 52.8, H 4.9 N 8.2; found C 53.1, H 5.0, N 8.0

Complex 12:

$^1\text{H-NMR}$  ( $\text{CD}_3\text{CN}$ , 500 MHz):  $\delta$  = 9.60-9.58 (m, 4 H,  $\gamma$  CH), 8.69 (2 s, 2 H, phenazine CH), 8.66 (2 s, 2 H, phenazine CH), 8.60 (d,  $J$  = 8.2 Hz, 4 H,  $\delta$  bpy), 8.56 (d,  $J$  = 8.2 Hz, 4 H,  $\delta$  bpy), 8.19 (dd,  $J$  = 4.3, 1.0 Hz, 4 H,  $\alpha$  CH), 8.11 (m, 4 H,  $\gamma$  bpy), 8.02 (m, 4 H,  $\gamma$  bpy), 7.91-7.85 (m, 4 H,  $\beta$  CH), 7.84 (m, 4 H,  $\alpha$  bpy), 7.72 (m, 4 H,  $\alpha$  bpy), 7.46 (m, 4 H,  $\beta$  bpy), 7.27 (m, 4 H,  $\beta$  bpy), 1.26 (m, 42 H, *i*-Pr)

$\text{MALDI-TOF}$ ,  $m/z$  (%): 2233 (100)  $[\text{M}^+ - 1 \text{PF}_6]$ , 2089 (20)  $[\text{M}^+ - 2 \text{PF}_6]$

Elemental analysis: calcd. ( $\text{Ru}_2\text{C}_{102}\text{H}_{90}\text{N}_{16}\text{Si}_2(\text{PF}_6)_4 \bullet 2 \text{H}_2\text{O}$ ): C 50.7, H 3.8, N 9.3; found C 51.0, H 3.7, N 8.7

$\text{MALDI-TOF}$  mass spectrum of **1**: Calcd. mass for  $\text{Ru}_2\text{C}_{84}\text{H}_{48}\text{N}_{16}(\text{PF}_6)_4$ : 2063 g  $\text{M}^{-1}$ ;

Found: 1919 (100)  $[\text{M}^+ - 1 \text{PF}_6]$ , 1773 (30)  $[\text{M}^+ - 2 \text{PF}_6]$ .

2-[(2*E*)-3-(4-*tert*-butylphenyl)-2-methylprop-2-enylidene] malononitrile<sup>i</sup> was used as matrix.

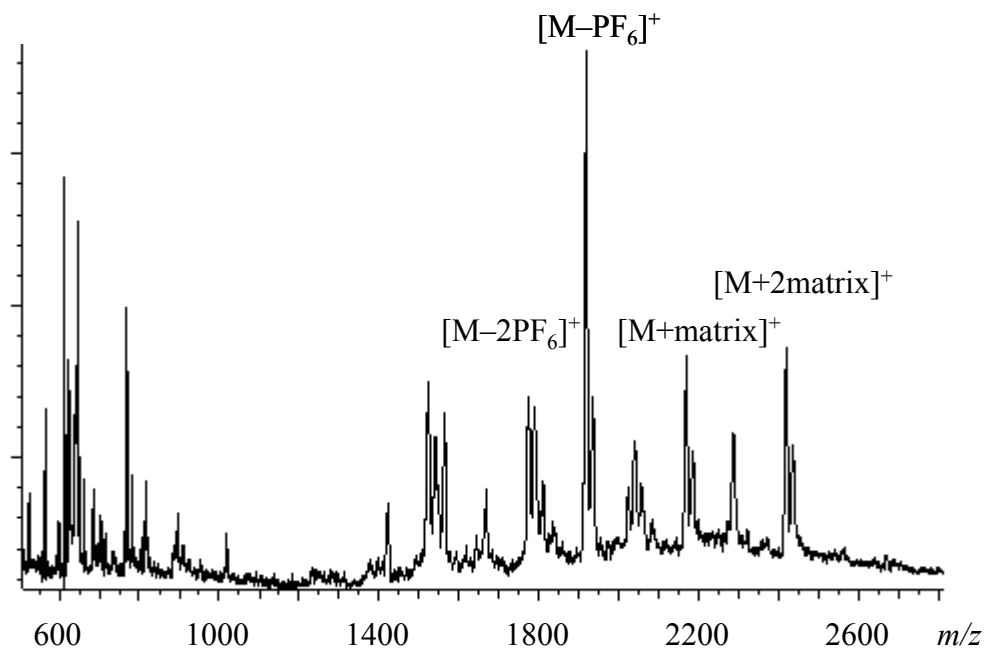

<sup>i</sup> T. Brown, N. L. Clipston, N. Simjee, H. Luftmann, H. Hungerbuehler, T. Drewello, *Int. J. Mass Spectr.*, **2001**, 210/211, 249-263.
